# Supplementary material for: Chiral nematic latex–GO composite films with synchronous response of color and actuation
Source: Royal Society of Chemistry journal article supplement (doi:10.1039/c8tc04319a), 2018-11-21
Supplement: c8tc04319a1.pdf [file c8tc04319a1.pdf]

Electronic Supplementary Information for  
**Chiral Nematic Latex-GO Composite Films with Synchronous  
Response of Color and Actuation**

Juanjuan Sun,<sup>a</sup> Xingxiang Ji,<sup>a</sup> Guihua Li,<sup>a</sup> Yu Zhang,<sup>a</sup> Na Liu,<sup>a</sup> Hongguang Li,<sup>b\*</sup>  
Menghua Qin,<sup>c\*</sup> Zaiwu Yuan<sup>a\*</sup>

<sup>a</sup> State Key Laboratory of Biobased Material and Green Papermaking & Key Laboratory of Fine Chemicals in Universities of Shandong, Qilu University of Technology (Shandong Academy of Sciences), Jinan 250353, China. E-mail: yuanzaiwu@163.com

<sup>b</sup> Key Laboratory of Colloid and Interface Chemistry, Ministry of Education, Shandong University, Jinan 250100, China. E-mail: hgli@licp.cas.cn

<sup>c</sup> Laboratory of Organic Chemistry, Taishan University, Taian 271021, China. E-mail: qmh@qlu.edu.cn

## Additional data

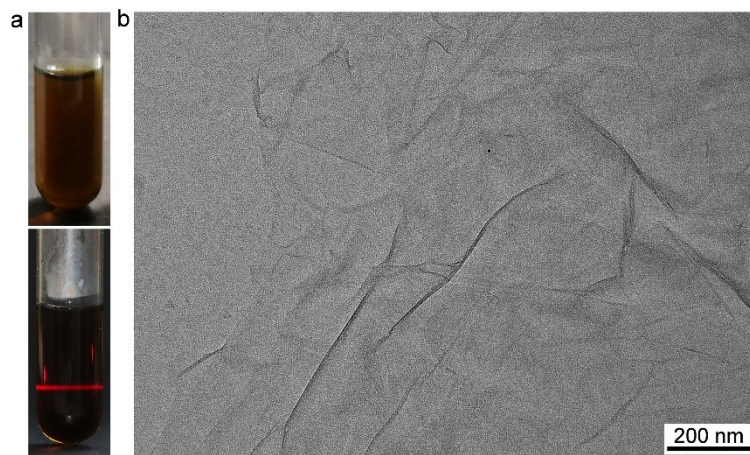

**Fig. S1** Photos (a) and TEM image (b) of the aqueous dispersion of GO ( $0.1 \text{ mg}\cdot\text{mL}^{-1}$ ).

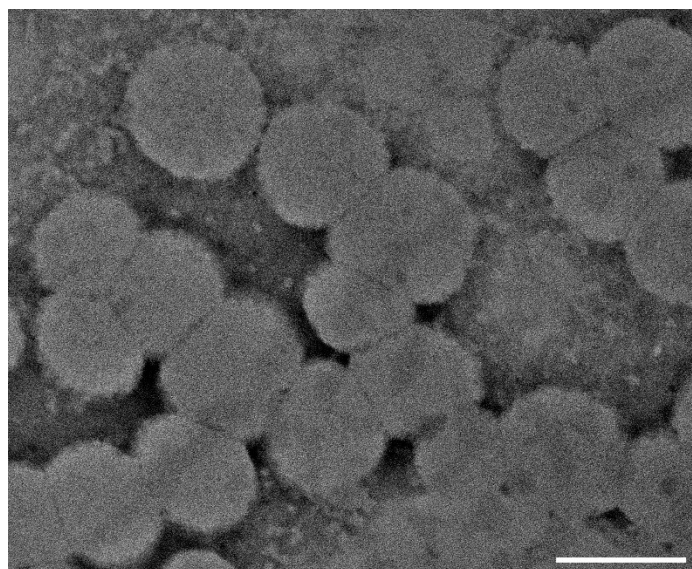

**Fig. S2** A typical TEM image of an aqueous dispersion of the as-prepared latex particles. The scale bar corresponds to 200 nm.

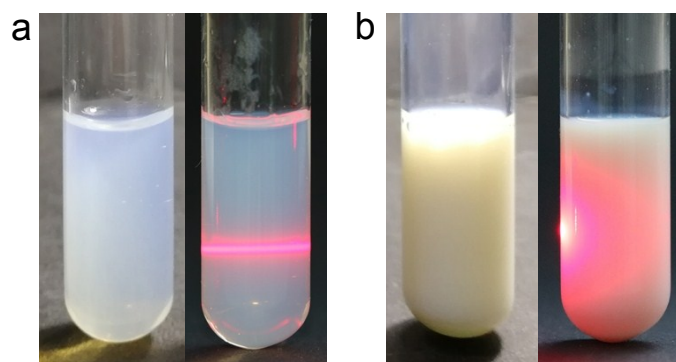

**Fig. S3** Photographs of aqueous dispersions of CNCs (4 wt%, a) and latex (40 wt%,

b).

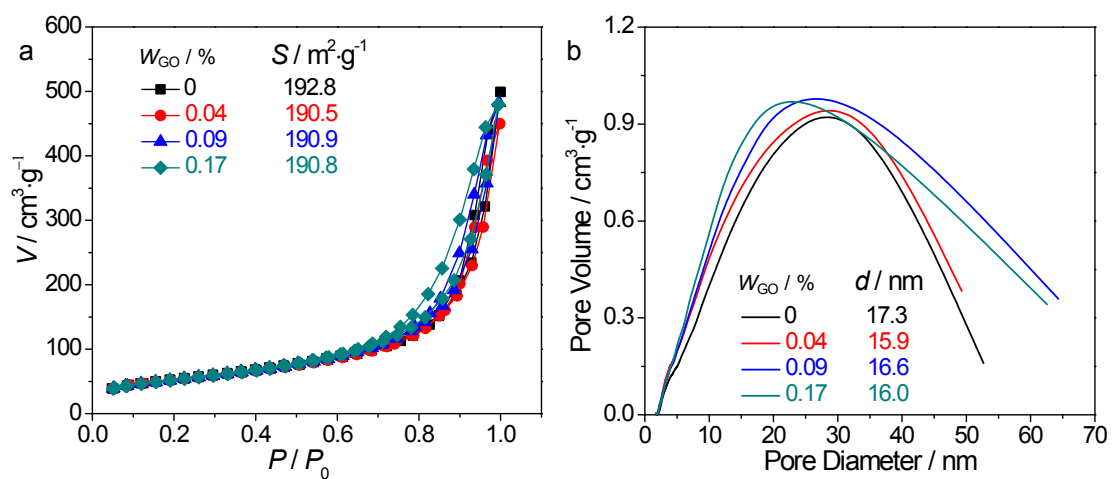

**Fig. S4** N<sub>2</sub> adsorption/desorption isotherms (a) and BJH pore size distribution (b) of the composite films after alkali treatment followed by SCCO<sub>2</sub> drying. The content of GO for each film is shown inset.

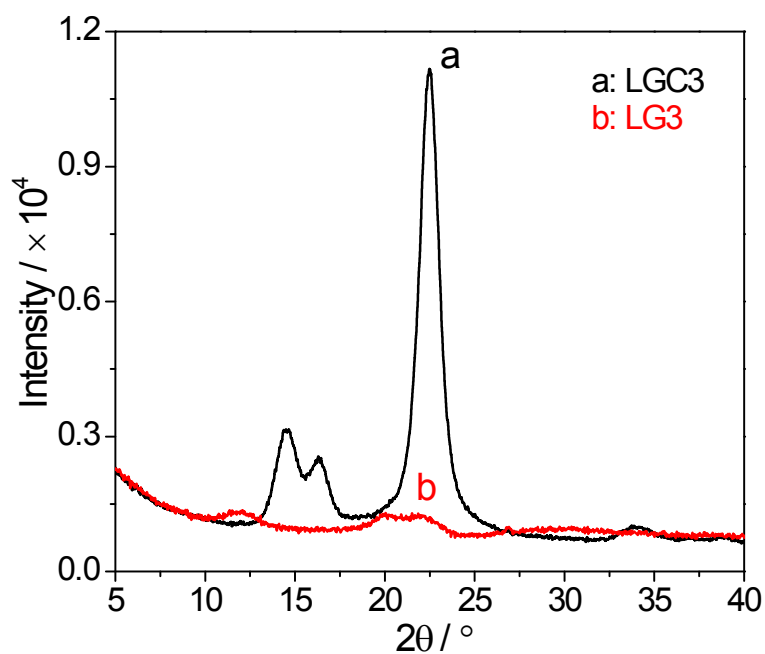

**Fig. S5** XRD diffraction patterns of LGC3 and LG3.

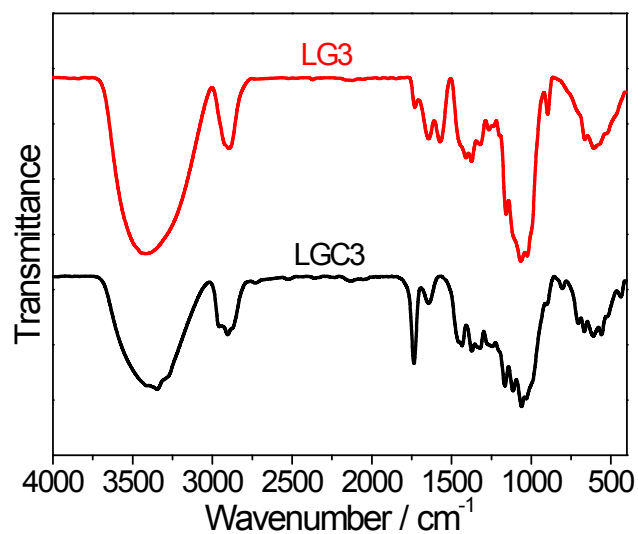

**Fig. S6** FTIR spectra of LGC3 and LG3.

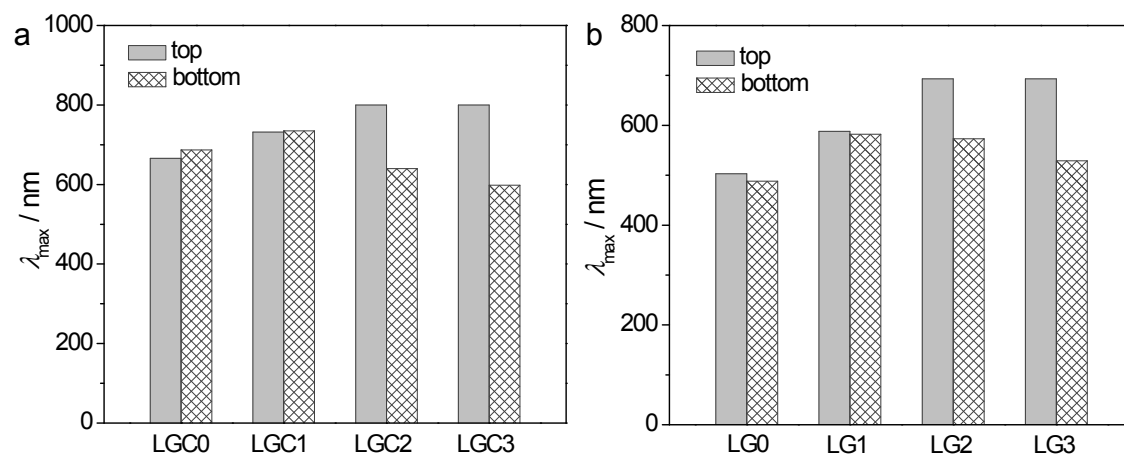

**Fig. S7** Summary of  $\lambda_{\text{max}}$  of the reflection spectra on the top and bottom surfaces for LGC (a) and LG (b) films.

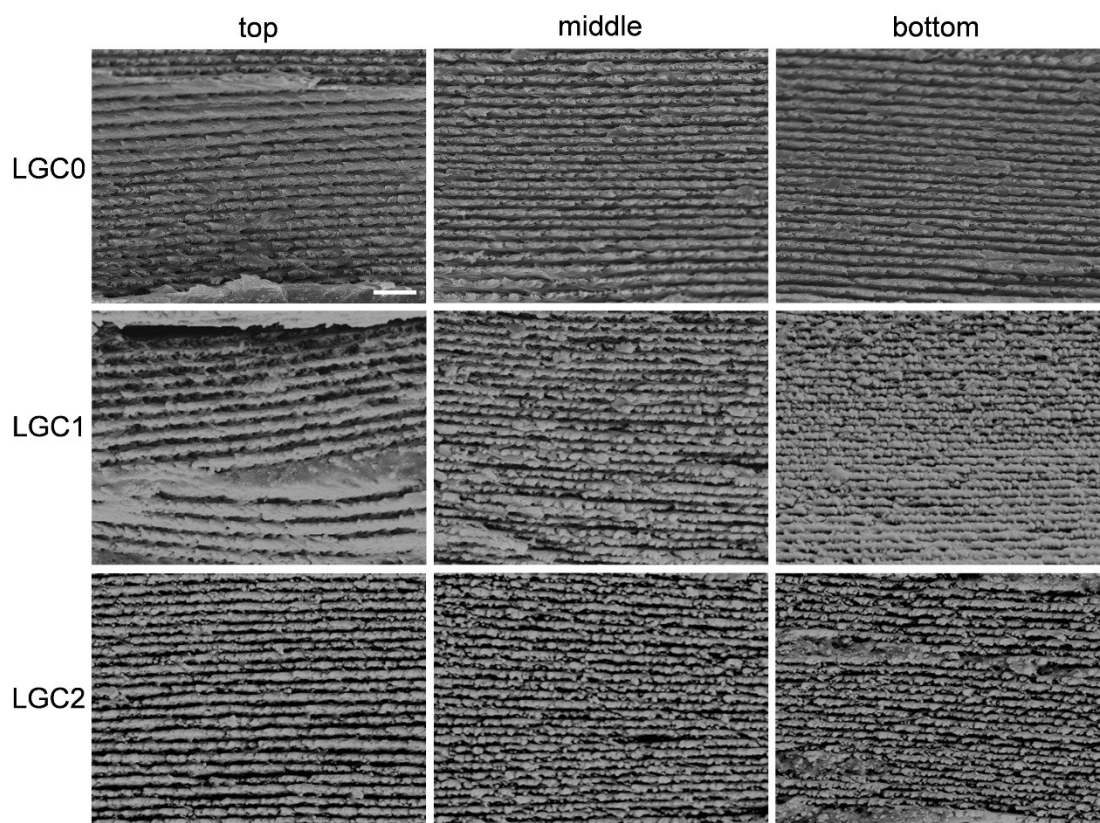

**Fig. S8** SEM images of the fracture surfaces of LGC0-2 at different regions as indicated. The magnification of all the images is the same with the scale bar to be 1  $\mu\text{m}$ .

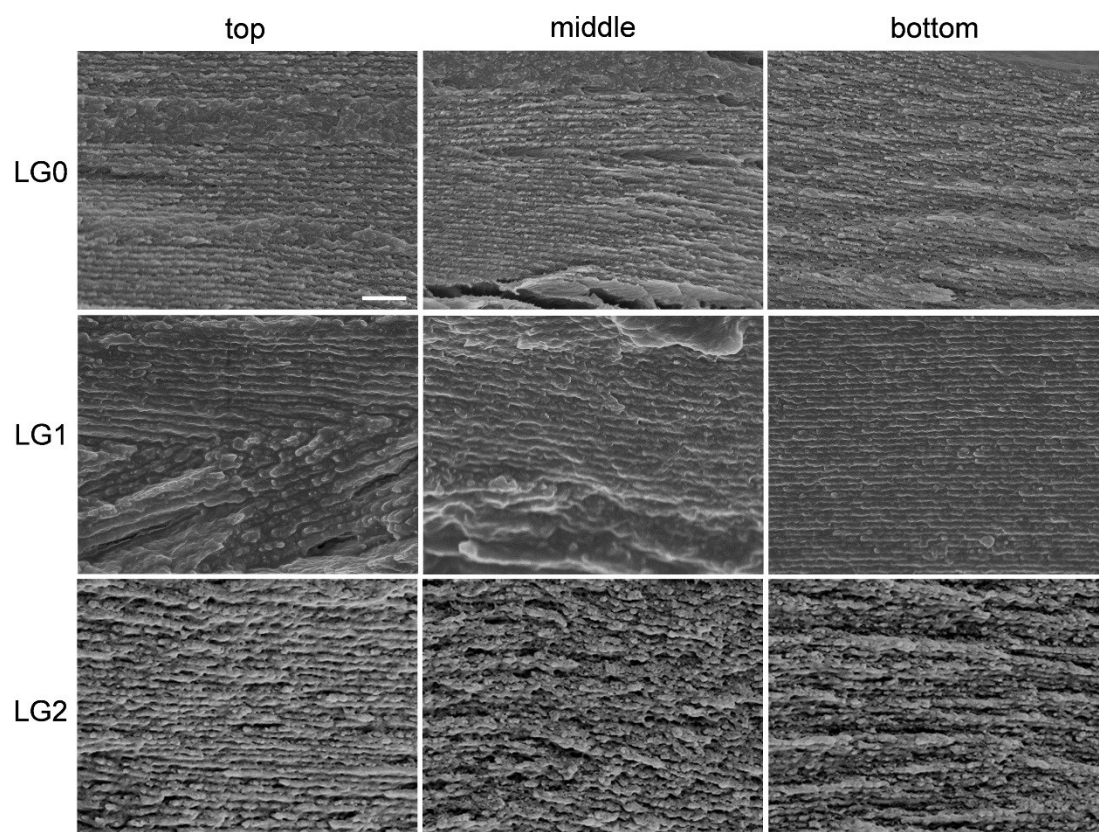

**Fig. S9** SEM images of the fracture surfaces of LG0-2 at different regions as indicated. The magnification of all the images is the same with the scale bar to be 1  $\mu\text{m}$ .

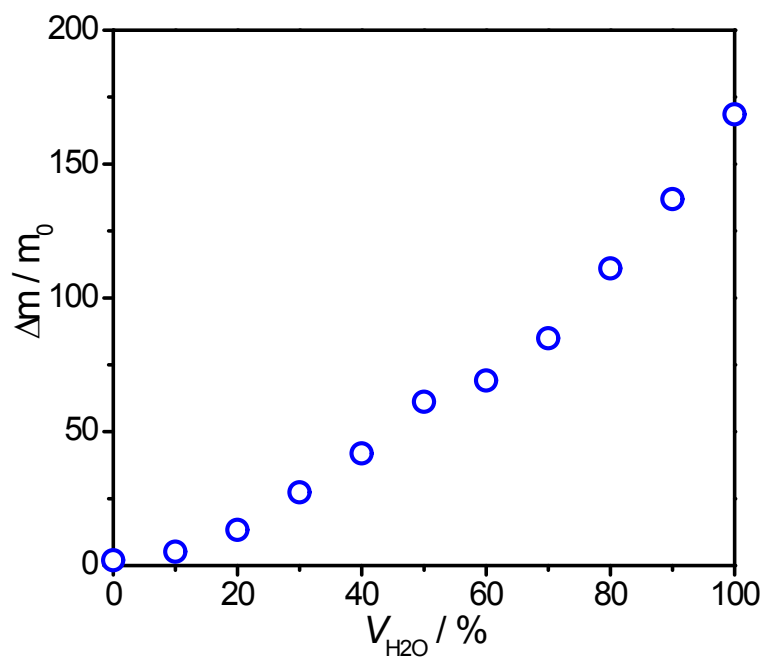

**Fig. S10** Variation of extra weight fraction ( $\Delta m / m_0$ ) as a function of  $V_{\text{H}_2\text{O}}$  for the film bar of LG3 immersed in  $\text{H}_2\text{O}/n\text{-PrOH}$  mixtures.

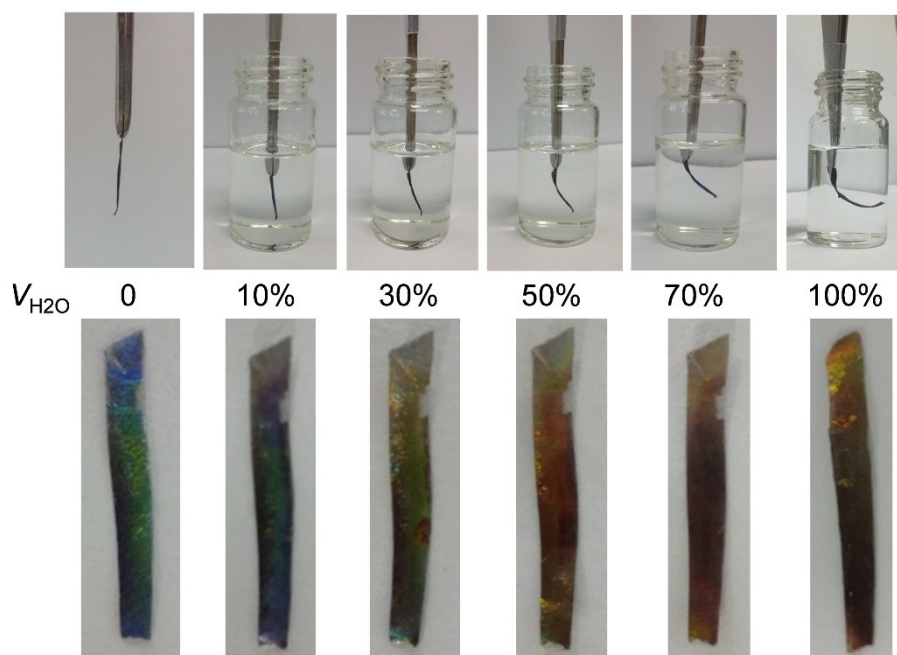

**Fig. S11** Photos of the film bar of LG3 immersed in H<sub>2</sub>O/MeOH mixtures with varying  $V_{H_2O}$ . Photos denoting the color change of the film bar are also given.

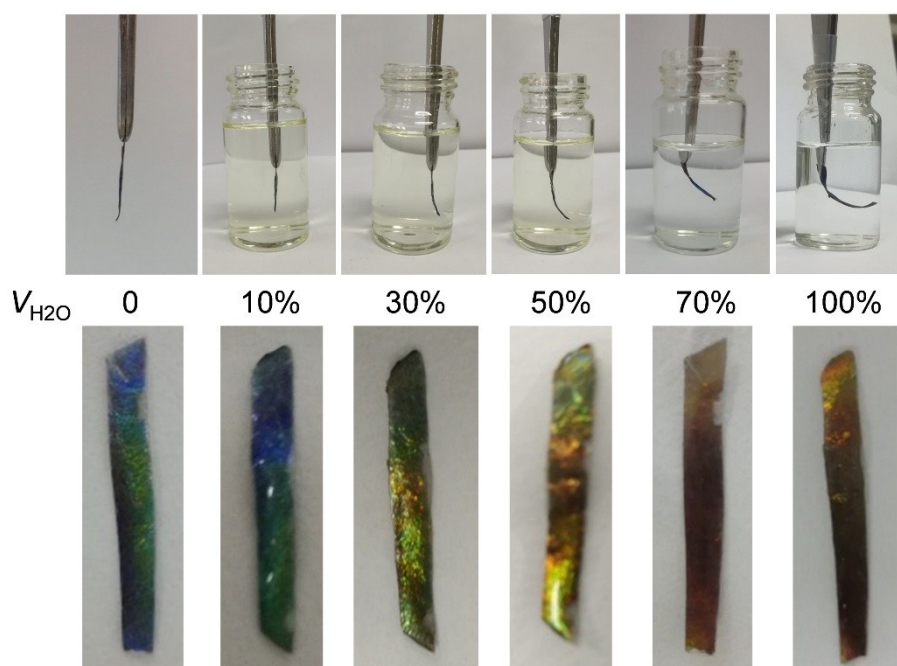

**Fig. S12** Photos of the film bar of LG3 immersed in H<sub>2</sub>O/acetone mixtures with varying  $V_{H_2O}$ . Photos denoting the color change of the film bar are also given.
